# Supplementary material for: Association between menopausal hormone therapy, mammographic density and breast cancer risk: results from the E3N cohort study
Source: Research Square preprint supplement (doi:10.21203/rs.3.rs-57670/v2), 2021-01-04
Supplement: Supplementary file 1 [file 79490a7de539804b437c4b21.docx]

**Supplementary Table S1** Characteristics of the study sample in comparison with the whole E3N cohort.

| **Characteristic** | **Controls**  ***N*=453**  **(%)** | **Expected** | **Cases**  ***N*=453**  **(%)** | **E3N**  ***N*=98,995**  **(%)** | ***p-value*** |
| --- | --- | --- | --- | --- | --- |
| *Cohort of birth* |  |  |  |  | *<0.001* |
| 1925-1929 | 11 (2.4) | 36 | 11 (2.4) | 7,808 (7.9) |  |
| 1930-1934 | 77 (17.0) | 59 | 78 (17.2) | 12,786 (12.9) |  |
| 1935-1939 | 145 (32.0) | 86 | 147 (32.5) | 18,742 (18.9) |  |
| 1940-1944 | 162 (35.8) | 109 | 160 (35.3) | 23,907 (24.2) |  |
| 1945-1949 | 58 (12.8) | 164 | 57 (12.6) | 35,752 (36.1) |  |
|  |  |  |  |  |  |
| *MHT at baseline, N (%)* |  |  |  |  | *<0.001* |
| Never | 396 (87.4) | 357 | 380 (83.9) | 67,899 (78.8) |  |
| Ever | 57 (12.6) | 96 | 73 (16.1) | 18,265 (21.2) |  |
|  |  |  |  |  |  |
| *BMI at baseline (kg/m2)* |  |  |  |  | *<0.001* |
| <=25 | 399 (88.1) | 372 | 381 (84.1) | 79,488 (82.2) |  |
| 25-30 | 51 (11.2) | 66 | 60 (13.2) | 14,123 (14.6) |  |
| >30 | 3 (0.7) | 14 | 12 (2.7) | 3,070 (3.2) |  |
|  |  |  |  |  |  |
| *Familiarity at baseline* |  |  |  |  | *0.003* |
| No | 394 (87.0) | 416 | 377 (83.2) | 86,013 (91.8) |  |
| Yes | 59 (13.0) | 37 | 76 (16.8) | 7,626 (8.1) |  |
|  |  |  |  |  |  |
| *Age of menarche (yrs)* |  |  |  |  | *0.57* |
| <12 | 69 (15.2) | 73 | 93 (20.5) | 15,619 (16.2) |  |
| 12 | 125 (27.6) | 136 | 119 (26.3) | 28,929 (30.0) |  |
| >12 | 259 (57.2) | 244 | 241 (53.2) | 51,975 (53.8) |  |
|  |  |  |  |  |  |
| *Use of oral contraceptives* |  |  |  |  |  |
| No | 232 (51.2) | 205 | 220 (48.6) | 44,811 (45.3) | *0.04* |
| Yes | 221 (48.8) | 248 | 233 (51.4) | 54,185 (54.7) |  |
|  |  |  |  |  |  |
| *Parity* |  |  |  |  |  |
| Nulliparous | 59 (13.0) | 63 |  | 12,176 (14.0) | *0.86* |
| Parous | 394 (87.0) | 390 |  | 74,441 (86.0) |  |
|  |  |  |  |  |  |
| *Lactation among parous* |  |  |  |  |  |
| Never | 94 (26.0) | 116 |  | 23,857 (32.0) | *<0.001* |
| Less than 4 months | 123 (34.0) | 166 |  | 34,257 (46.0) |  |
| 4 months or more | 145 (40.0) | 80 |  | 16,327 (22.0) |  |
