# Supplementary material for: Association between menopausal hormone therapy, mammographic density and breast cancer risk: results from the E3N cohort study
Source: Research Square preprint supplement (doi:10.21203/rs.3.rs-57670/v2), 2021-01-04
Supplement: Supplementary file 1 [file fbe632f29e89c7fde3da2863.docx]

**Supplementary Table S3.**  Mediation analysis of the effect of ever versus never use (reference category) of menopausal hormone therapy on breast cancer risk, overall and by ER and PR status. The table reports the OR and 95% confidence intervals from the unconditional logistic models adjusted for age at mammogram and the matching variables (reference age, year of birth and menopausal status at baseline).

|  | **All** | **ER or PR positive** | **ER and PR negative** |
| --- | --- | --- | --- |
|  | *NCA*=405/*NCO*=405 | *NCA*=304/*NCO*=304 | *NCA=*50/*NCO*=50 |
| **Partially adjusted model*** |  |  |  |
| Total effect | 1.79 (1.26 to 2.58) | 1.68 (1.08 to 2.73) | 2.06 (0.85 to 5.34) |
| Average direct effect | 1.62 (1.15 to 2.30) | 1.46 (0.94 to 2.34) | 1.98 (0.78 to 5.23) |
| Average joint mediated effect | 1.09 (1.00 to 1.22) | 1.15 (1.01 to 1.35) | 1.00 (0.81 to 1.44) |
| Average mediated effect by PMD | 1.15 (1.06 to 1.27) | 1.23 (1.10 to 1.44) | 1.08 (0.93 to 1.48) |
| Average mediated effect by BMI | 0.95 (0.89 to 1.00) | 0.94 (0.85 to 1.00) | 1.00 (0.78 to 1.07) |
|  |  |  |  |
| **Totally adjusted model†** |  |  |  |
| Total effect | 1.79 (1.26 to 2.54) | 1.60 (1.03 to 2.43) | 2.16 (0.88 to 6.39) |
| Average direct effect | 1.62 (1.15 to 2.26) | 1.40 (0.91 to 2.13) | 1.98 (0.78 to 5.65) |
| Average joint mediated effect | 1.10 (1.01 to 1.23) | 1.13 (1.01 to 1.32) | 1.05 (0.85 to 1.55) |
| Average mediated effect by PMD | 1.15 (1.07 to 1.28) | 1.22 (1.09 to 1.41) | 1.06 (0.92 to 1.54) |
| Average mediated effect by BMI | 0.95 (0.89 to 1.00) | 0.94 (0.84 to 1.00) | 1.00 (0.83 to 1.14) |

*Model including: age, BMI and MHT at mammogram; menopausal status at baseline and year of birth. †Model including: age, BMI and MHT at mammogram; menopausal status, familiarity, parity, lactation, use of oral contraceptives at baseline; year of birth and age of menarche.
