# Supplementary material for: Association between menopausal hormone therapy, mammographic density and breast cancer risk: results from the E3N cohort study
Source: Research Square preprint supplement (doi:10.21203/rs.3.rs-57670/v2), 2021-01-04
Supplement: Supplementary file 2 [file ec5f1f5a2b6b2e5214e932a4.docx]

**Supplementary Table S2.** Values of the Akaike Information Criterion (AIC) for regression models with the square root of percent mammographic density (PMD), dense area (DA) and non-dense area (NDA) as polynomial functions of duration of MHT use and time since last use.

| **Duration** | **Time since last use** | **PMD (%)**  AIC | **DA (cm2)**  AIC | **NDA (cm2)**  AIC |
| --- | --- | --- | --- | --- |
| Linear | Linear | 4047 | 4126 | 4608 |
| Linear | Quadratic | 4043 | 4122 | 4607 |
| Linear | Cubic | 4044 | 4123 | 4609 |
| Quadratic | Linear | 4049 | 4127 | 4608 |
| Quadratic | Quadratic | 4045 | 4123 | 4607 |
| Quadratic | Cubic | 4046 | 4124 | 4609 |
| Cubic | Linear | 4050 | 4128 | 4610 |
| Cubic | Quadratic | 4046 | 4124 | 4609 |
| Cubic | Cubic | 4047 | 4126 | 4611 |
